# Supplementary material for: Copper nanoparticles anchored onto boron-doped graphene nanosheets for use as a high performance asymmetric solid-state supercapacitor
Source: Royal Society of Chemistry journal article supplement (doi:10.1039/c8ra08762h), 2019-01-01
Supplement: c8ra08762h1.pdf [file c8ra08762h1.pdf]

## **Supporting Information**

### **Copper Nanoparticles Anchored Boron Doped Graphene Nanosheet for High performance Asymmetric Solid-State Supercapacitors**

**P. Muthu Pandian and A. Pandurangan \***

Department of Chemistry, Anna University, Chennai – 600 025, Tamil Nadu, India

\*Correspondence: pandurangan\_a@yahoo.com; Tel.: +91 44 22358653; fax: +91 44 22200660

**Figure S1.** Deconvoluted XPS spectra of O1s, (a) CuBG3 and (b) CuBG4

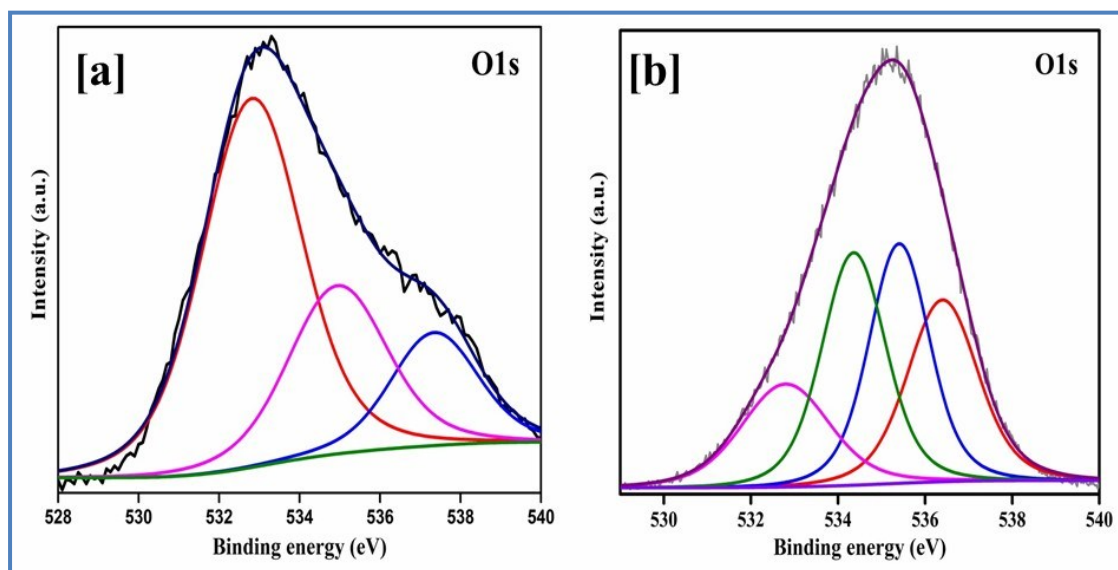

**Figure S2.** Cyclic voltammetry at different scan rate and Charge-discharge curve at different current density of CuBG5(a,b), CuBG3(c,d), CuBG2(e,f), CuBG1(g,h) in H<sub>2</sub>SO<sub>4</sub>/PVA

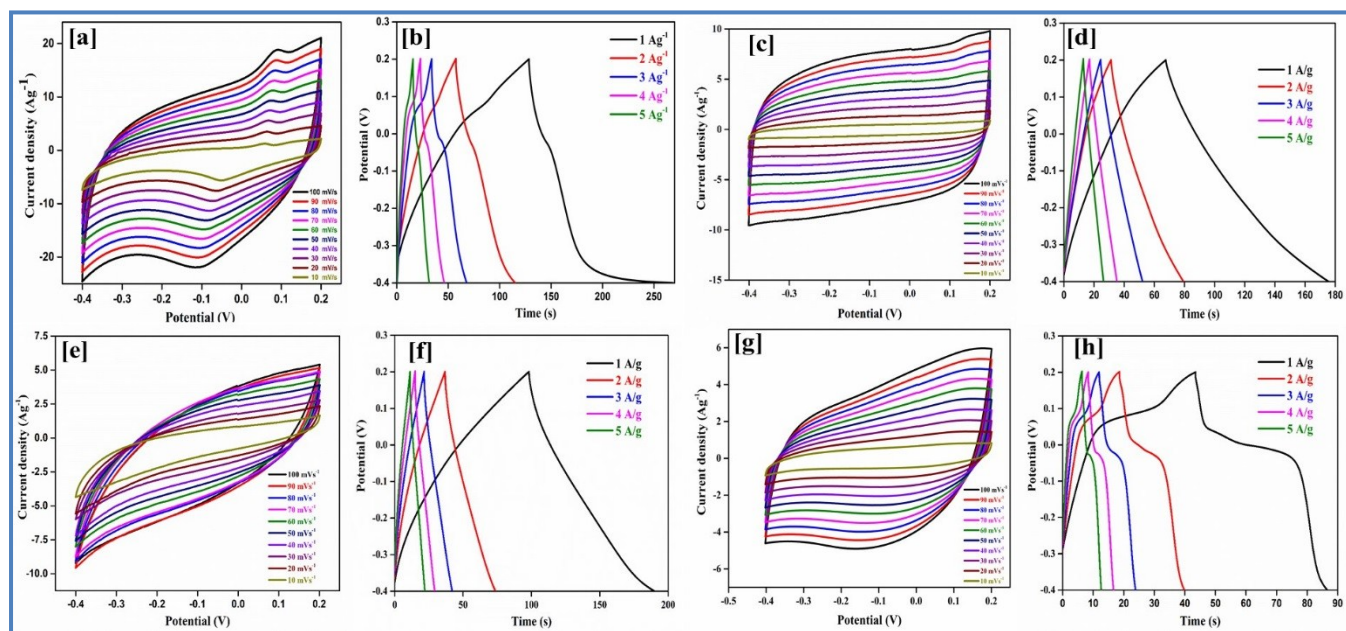

**Figure S3.** Capacitance retention and Coulombic efficiency of CuBG1(a), CuBG2(b), CuBG3(c), CuBG4(d) and CuBG5(e) with first and last five cycle

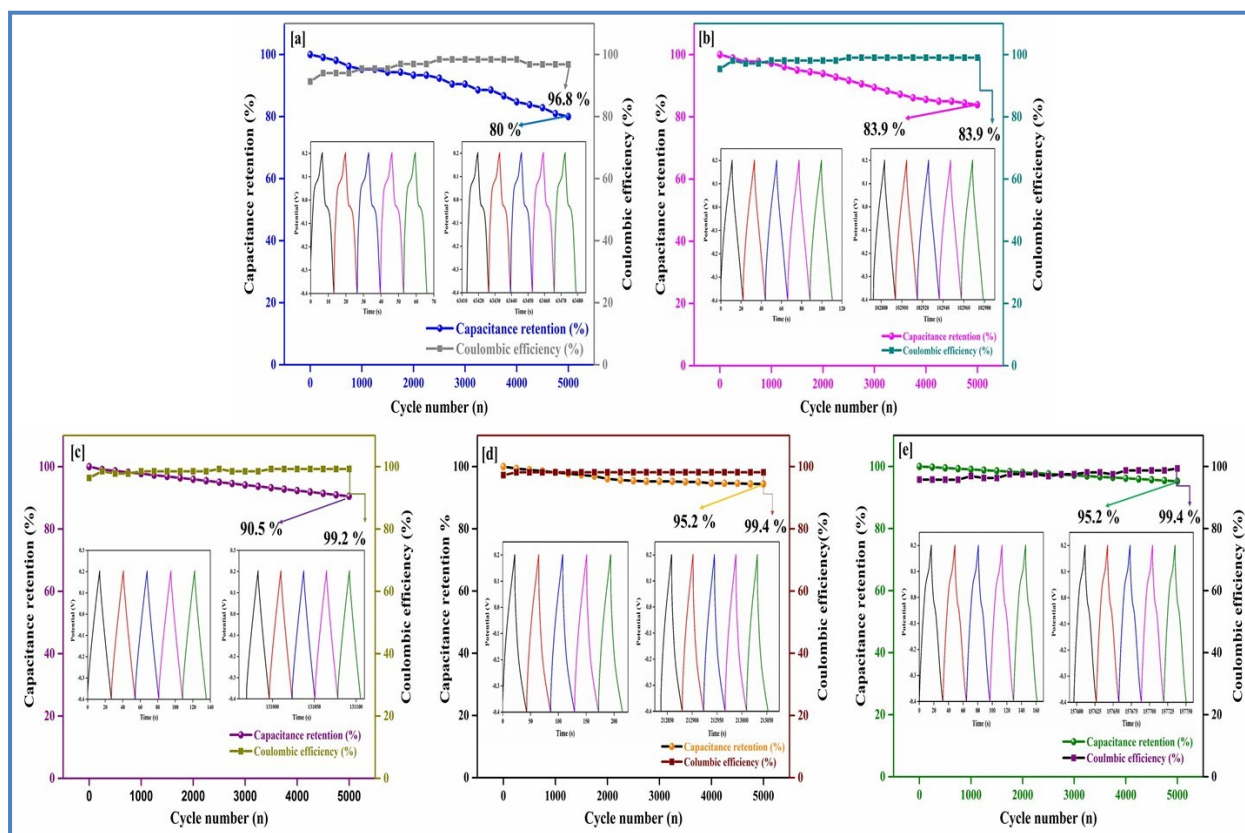

**Figure S4.** Graphical abstract of CuBG3 (a), Cyclic voltammetry of rGO//CuBG3 device at  $50 \text{ mVs}^{-1}$  (b), CV curve of CuBG3 at different potential from 0.8 V - 2.0 V (c), Charge-discharge curve of CuBG3 at different potential (d), Specific Capacitance of CuBG3 at different potential window (e), CV and charge-discharge curve of CuBG3 at different scan rate in a high potential 2.0 V (f,g) and the specific capacitance of CuBG3 at different current density (from  $1 \text{ Ag}^{-1}$  to  $20 \text{ Ag}^{-1}$ ) in potential 2.0 V (h).

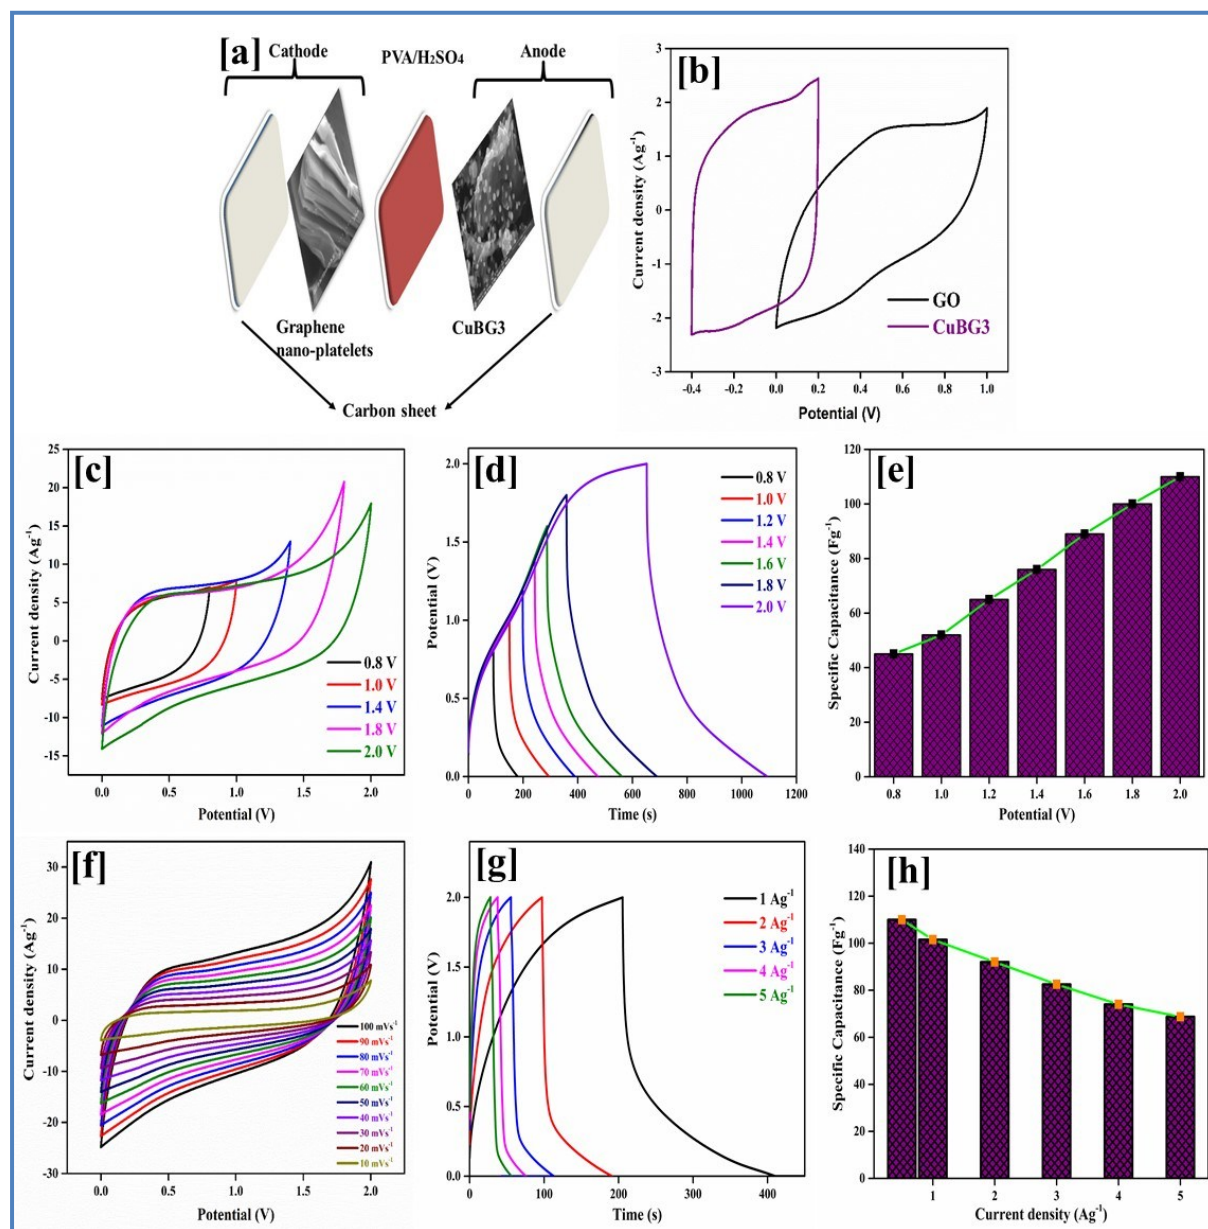

**Figure S5.** Cyclic voltammetry and charge-discharge curve of rGO//CuBG3 at different potential window

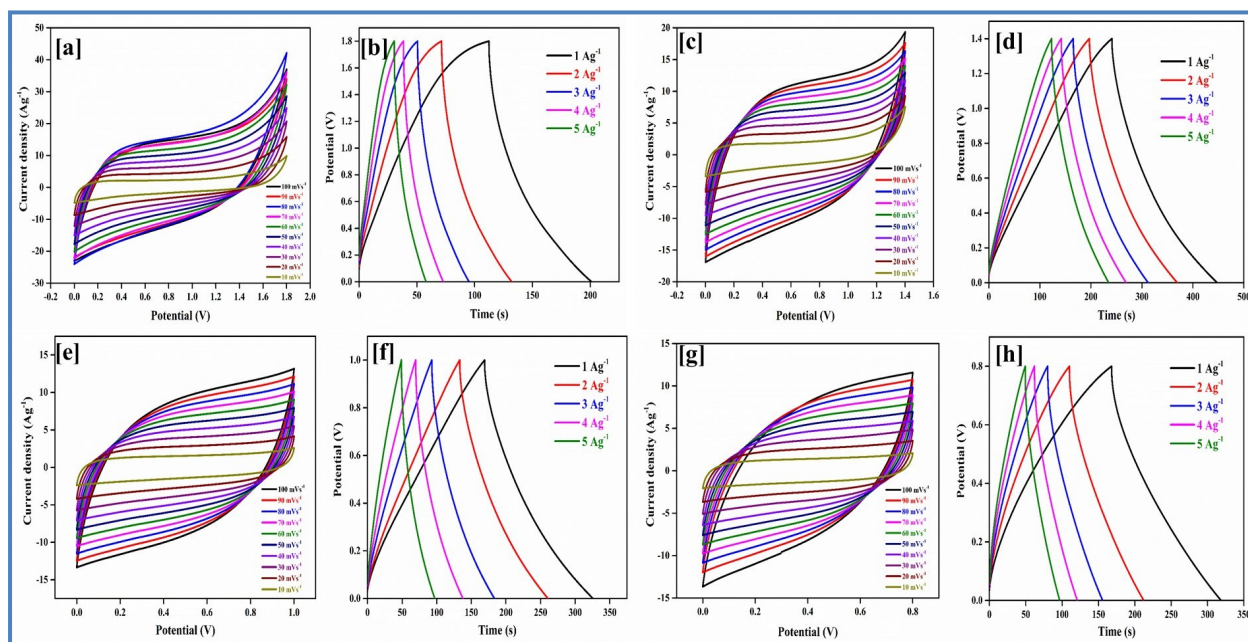



**Figure S6.** Specific capacitance at different potential and at different current densities from 1  $\text{Ag}^{-1}$  to 20  $\text{Ag}^{-1}$  calculated from the discharge curve(a), energy and power density calculated from specific capacitance at different potential and different current densities(b), % of capacitance retention and % of coulombic efficiency of rGO//CuBG3 for 5000 cycles(c), Nyquist plot before and after the cyclic stability of 5000 cycles(d) the circuit used for the calculation is inserted and the table with electrochemical studies are placed.

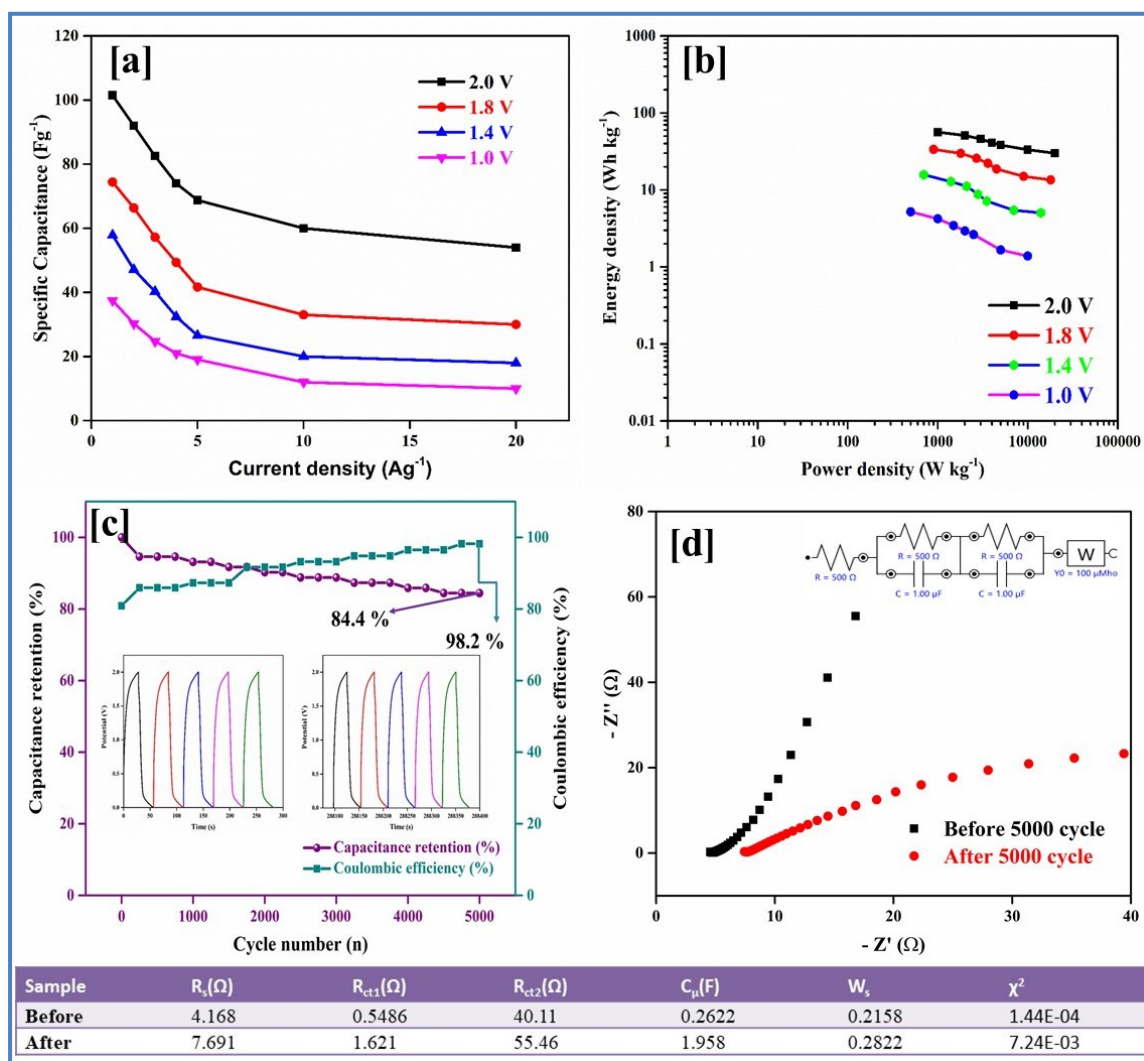

**Figure S7.** Graphical abstract of CuBG5 (a), Cyclic voltammetry of rGO//CuBG5 device at  $50 \text{ mVs}^{-1}$  (b), CV curve of CuBG5 at different potential from 0.8 V - 2.0 V (c), Charge-discharge curve of CuBG5 at different potential (d), Specific Capacitance of CuBG5 at different potential window (e), CV and charge-discharge curve of CuBG5 at different scan rate in a high potential 2.0 V (f,g) and the specific capacitance of CuBG5 at different current density (from  $1 \text{ Ag}^{-1}$  to  $20 \text{ Ag}^{-1}$ ) in potential 2.0 V (h).

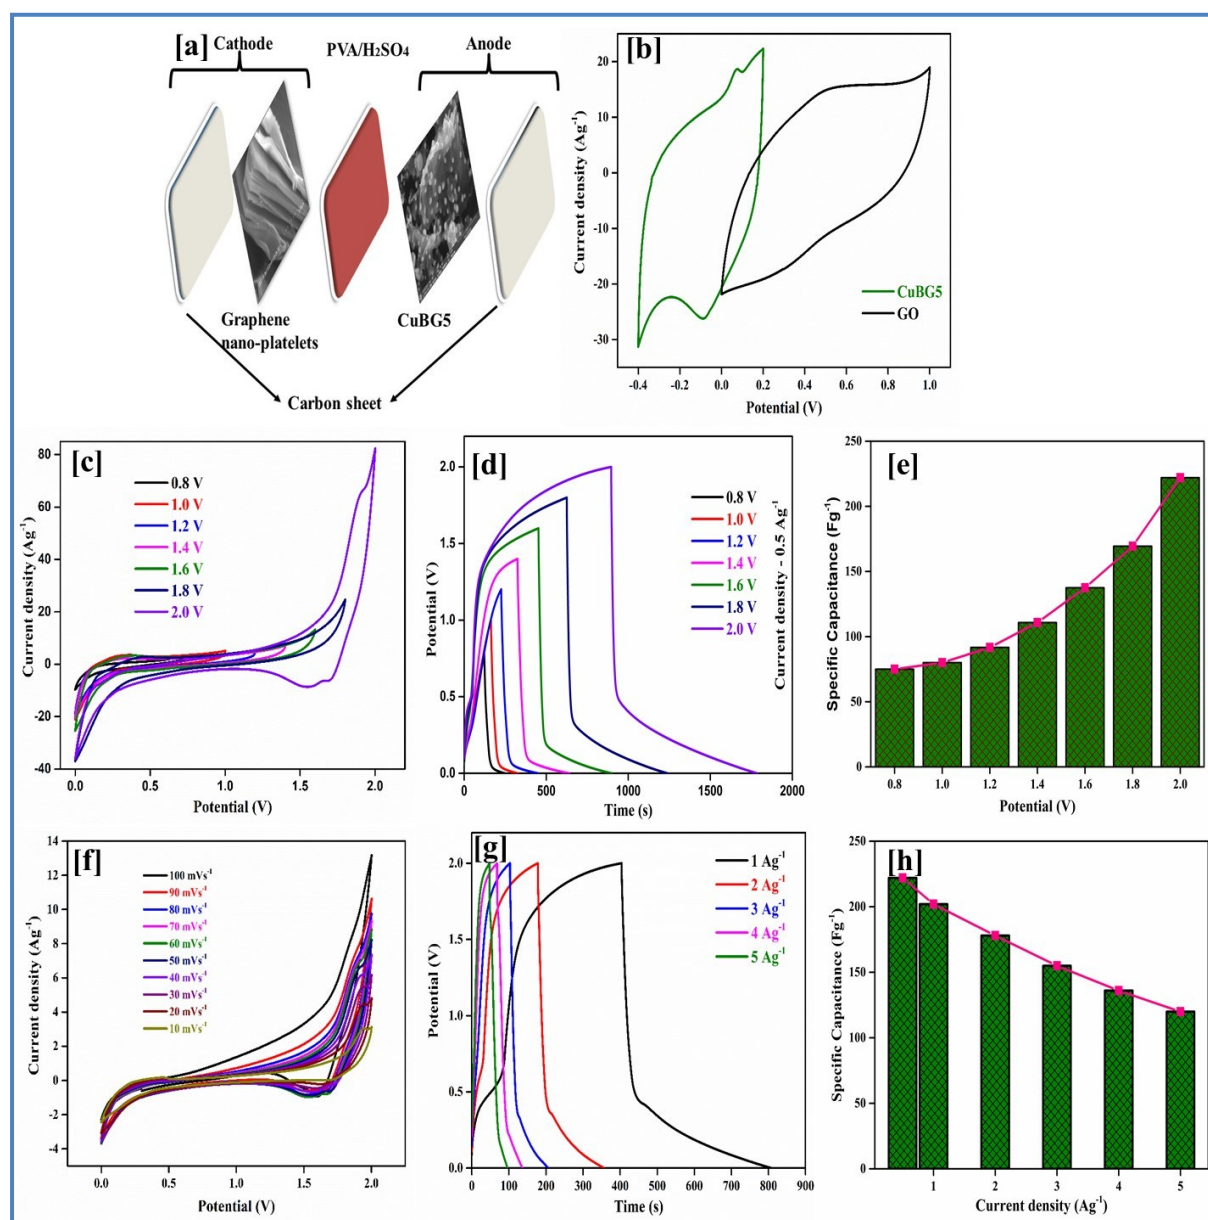



**Figure S8.** Cyclic voltammetry and charge-discharge curve of rGO//CuBG5 at different potential window

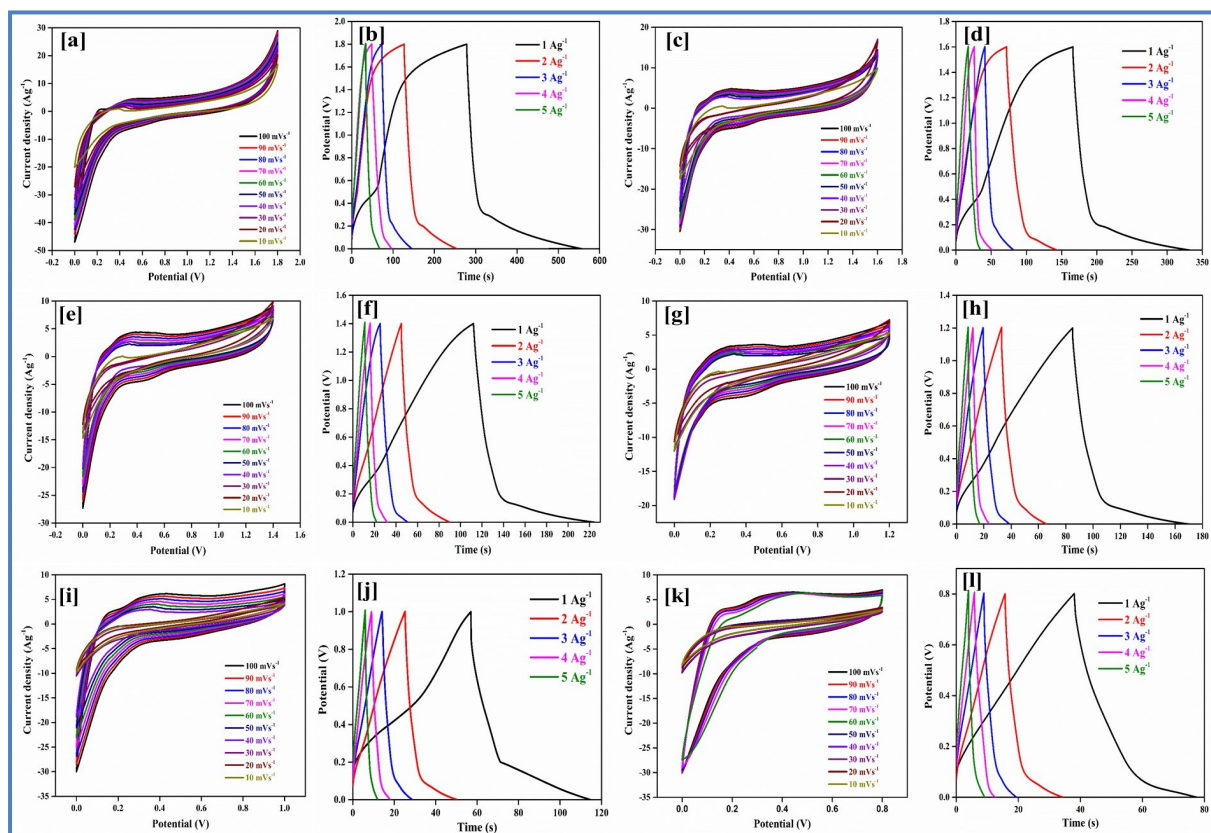

**Figure S9.** Specific capacitance at different potential and at different current densities from 1  $\text{Ag}^{-1}$  to 20  $\text{Ag}^{-1}$  calculated from the discharge curve(a), energy and power density calculated from specific capacitance at different potential and different current densities(b), % of capacitance retention and % of coulombic efficiency of rGO//CuBG5 for 5000 cycles(c), Nyquist plot before and after the cyclic stability of 5000 cycles(d) the circuit used for the calculation is inserted and the table with electrochemical studies are placed.

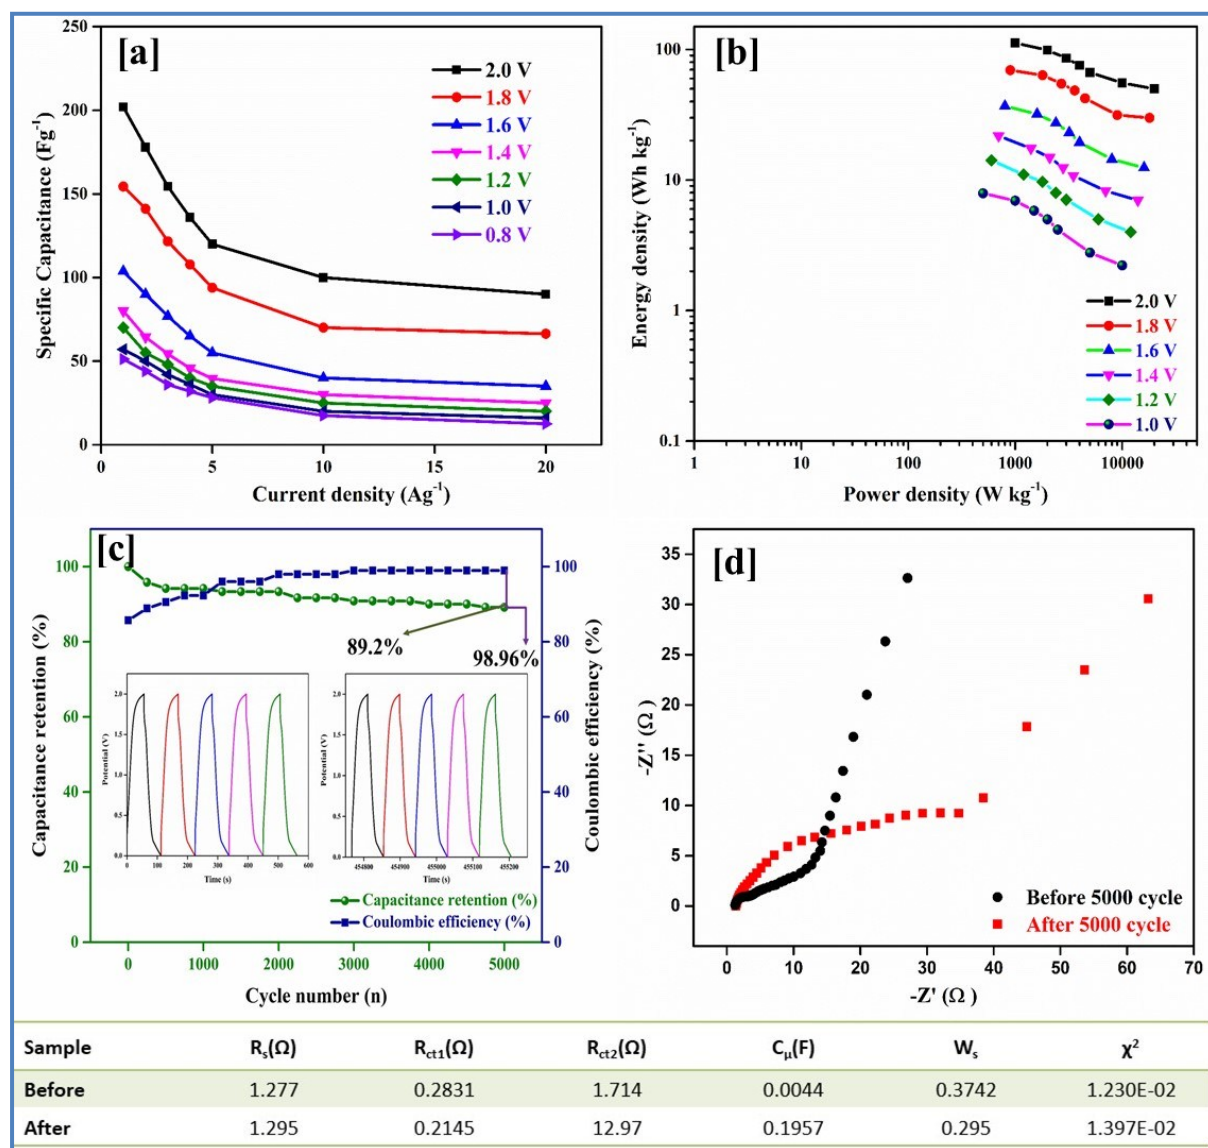

**Figure S10.** Cyclic voltammetry and charge-discharge curve of rGO//CuBG4 at different potential window in H<sub>2</sub>SO<sub>4</sub>/PVA

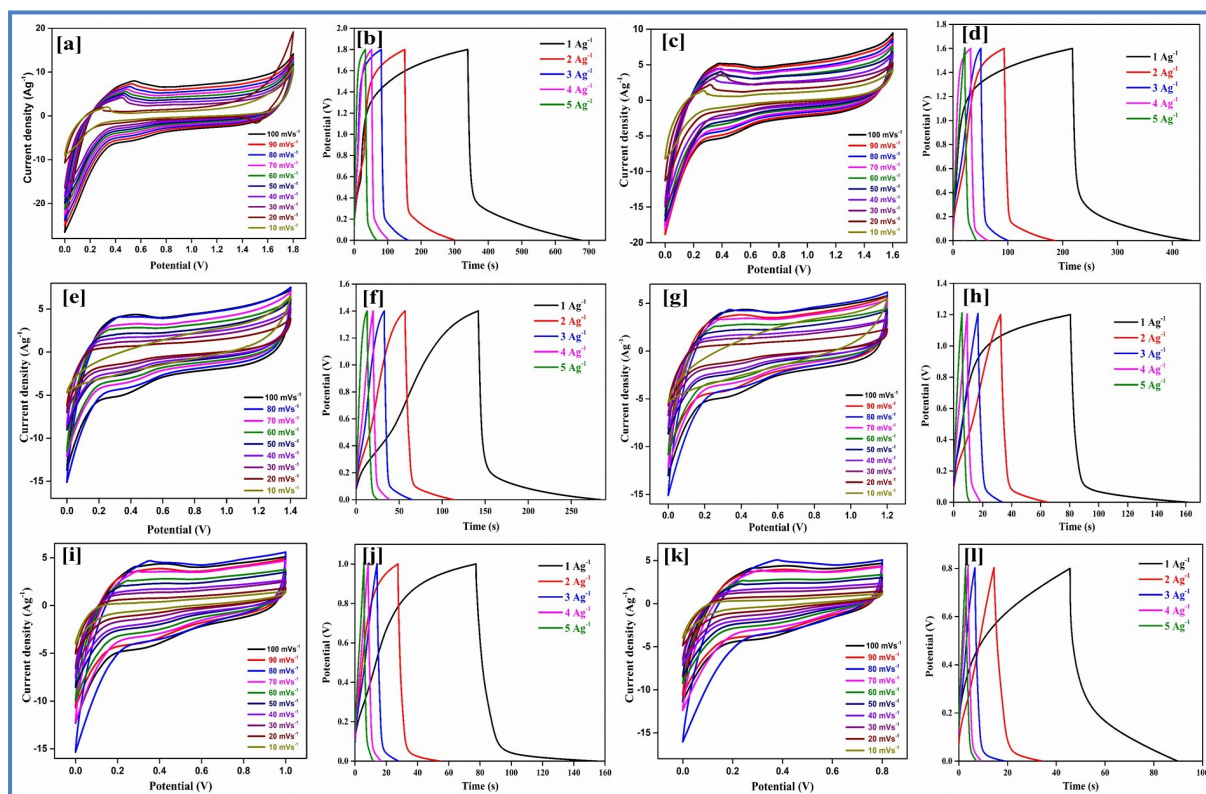

**Figure S11.** Cyclic voltammetry at different scan rate and Charge-discharge curve at different current density of CuBG1(a,b), CuBG2(c,d), CuBG3(e,f), CuBG5(g,h) in KOH

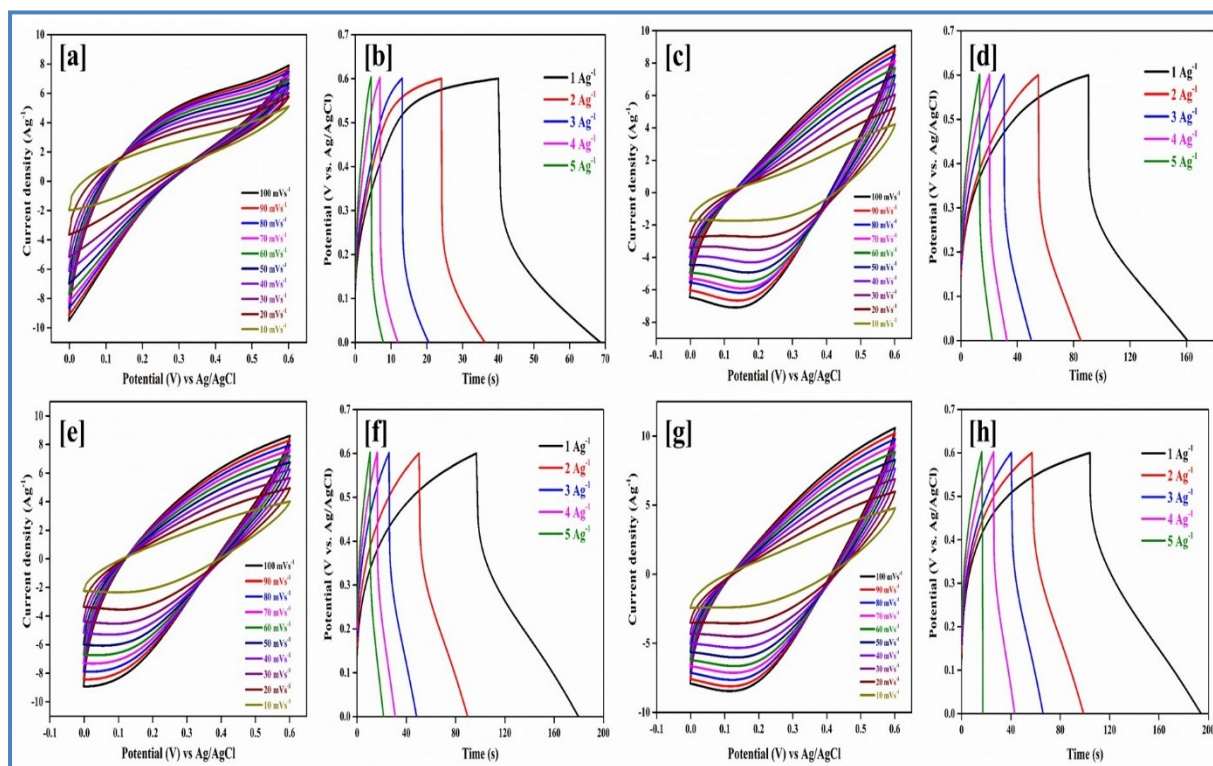

**Figure S12.** Cyclic voltammetry of activated charcoal at different scan rate, (b) Charge/discharge curve of AC at different current density and (c) Specific capacitance at different current density.

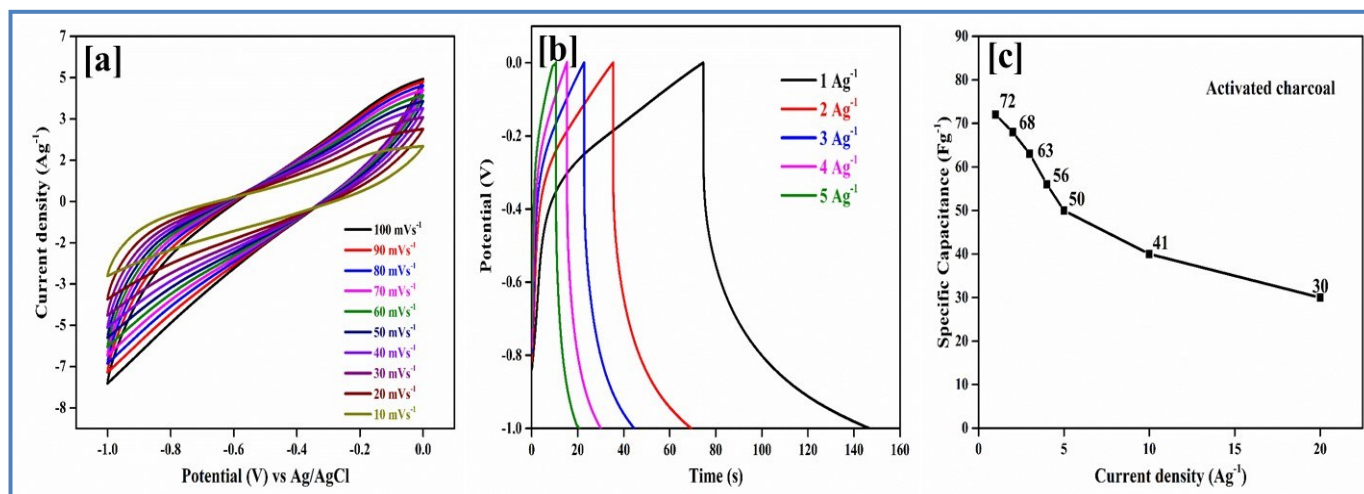



**Figure S13.** Cyclic voltammetry and charge-discharge curve of CuBG4//AC at different potential window in KOH/PVA

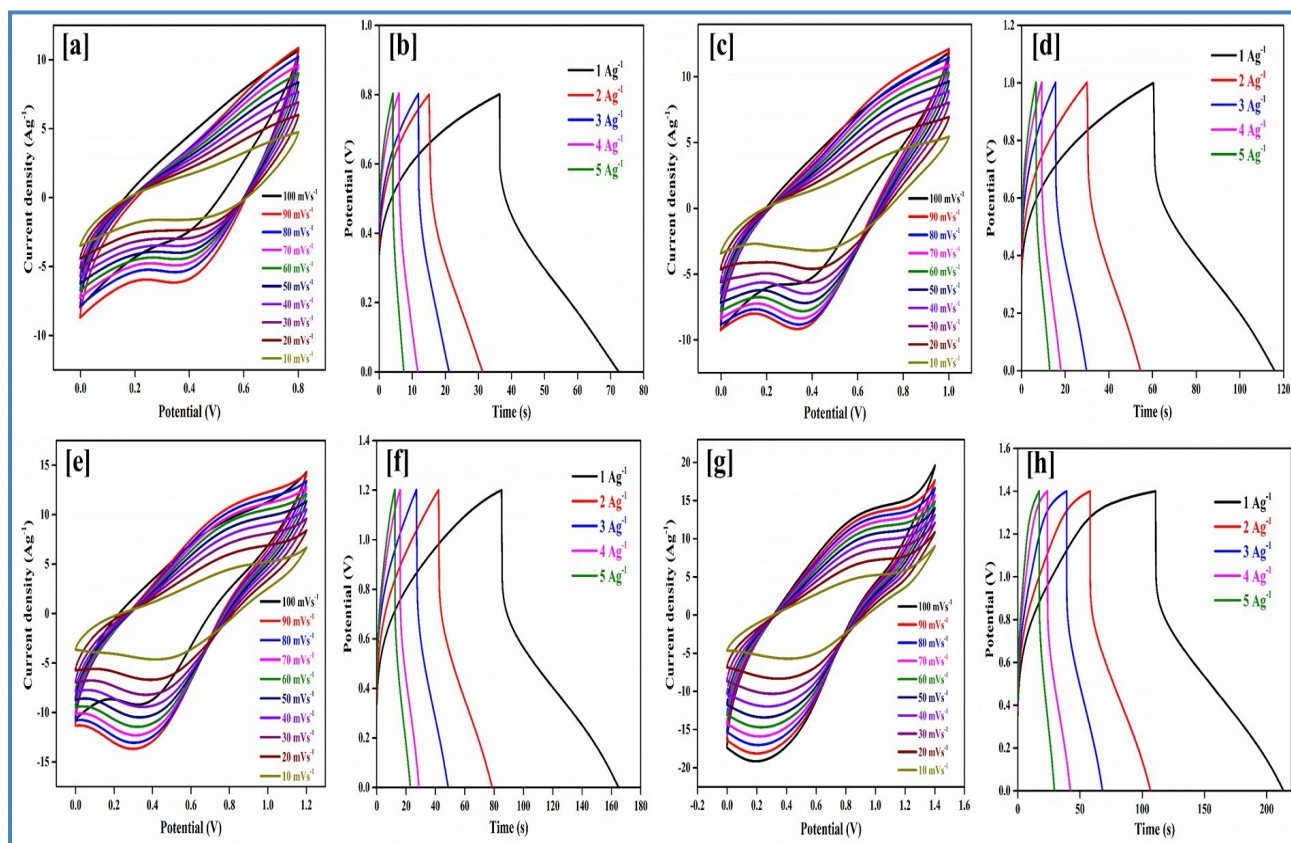

**Table S1.** Comparative study based on all solid-state asymmetric supercapacitor with different metal oxide/sulphide

| S.No | Cathode                         | Anode                  | Cell Voltage (V) | Current density ( $\text{Ag}^{-1}$ ) | Csp ( $\text{Fg}^{-1}$ ) | Cycle life (No. of cycle) | Energy density ( $\text{Wh kg}^{-1}$ ) | Power density ( $\text{W kg}^{-1}$ ) | Reference |
|------|---------------------------------|------------------------|------------------|--------------------------------------|--------------------------|---------------------------|----------------------------------------|--------------------------------------|-----------|
| 1    | $\text{Co}_3\text{O}_4$         | Carbon aerogel         | 1.5              | 1                                    | 57.4                     | 85 % (1000)               | 17.9                                   | 750                                  | 1         |
| 2    | MnS                             | Activated charcoal     | 1.6              | 1                                    | 110.4                    | 89.87 % (5000)            | 37.6                                   | 181.2                                | 2         |
| 3    | Ni-Co-S                         | Graphene               | 1.8              | 2                                    | 133                      | 82.2 % (20000)            | 60                                     | 1800                                 | 3         |
| 4    | $\text{Fe}_3\text{O}_4$ /Carbon | Porous carbon          | 1.4              | 1                                    | 58.5                     | 70.8 % (5000)             | 18.3                                   | 351                                  | 4         |
| 5    | $\text{Cu}(\text{OH})_2$        | Activated charcoal     | 1.6              | 4                                    | 26.4                     | 90 % (5000)               | 3.68                                   | 1253                                 | 5         |
| 6    | Cu-B/Graphene nanosheet         | Reduced Graphene oxide | 2                | 5                                    | 153.75                   | 90.84 % (5000)            | 85                                     | 5000                                 | This work |

## References

1. W. Liu, X. Li, M. Zhu and X. He, *Journal of Power Sources*, 2015, **282**, 179-186.
2. T. Chen, Y. Tang, Y. Qiao, Z. Liu, W. Guo, J. Song, S. Mu, S. Yu, Y. Zhao and F. Gao, *Scientific Reports*, 2016, **6**, 23289.
3. J. Shi, X. Li, G. He, L. Zhang and M. Li, *Journal of Materials Chemistry A*, 2015, **3**, 20619-20626.
4. H. Fan, R. Niu, J. Duan, W. Liu and W. Shen, *ACS Applied Materials & Interfaces*, 2016, **8**, 19475-19483.
5. J. Chen, J. Xu, S. Zhou, N. Zhao and C.-P. Wong, *Journal of Materials Chemistry A*, 2015, **3**, 17385-17391.
